# Supplementary material for: Osteogenic Commitment of Human Periodontal Ligament Cells Is Predetermined by Methylation, Chromatin Accessibility and Expression of Key Transcription Factors
Source: MDPI journal article supplement (doi:10.3390/cells11071126), 2022-03-26
Supplement: s1 [file s1]

Supplementary Table S1. Primer sequences used for RT-qPCR.

| Gene  |         | Primer sequence 5'-3'    | Reactions Conditions       |
|-------|---------|--------------------------|----------------------------|
| ACTB  | Forward | CCAACCGCGAGAAGATGA       | 95 °C – 10"                |
|       | Reverse | CCAGAGGCGTACAGGGATAG     | 61 °C - 10"<br>72 °C – 10" |
| OCT4  | Forward | CGCAAGCCCTCATTCAC        | 95 °C– 10"                 |
|       | Reverse | CATCACCTCCACCACCTG       | 60 °C– 06"<br>72 °C– 06"   |
| PPARG | Forward | GCTTATCTATGACAGATGTGATCT | 95 °C– 10"                 |
|       | Reverse | AGCTTCTCCTTCTCGGC        | 55 °C– 10"<br>72 °C– 10"   |
| SIX3  | Forward | CCTCCTCCTCTTCCTCCTCT     | 95 °C – 10"                |
|       | Reverse | AGTGGTAGATGGTGGTTGGG     | 60 °C - 20"<br>72 °C – 10" |
| SP7   | Forward | ATGAGTGGGAAAAGGGAGGG     | 95 °C – 10"                |
|       | Reverse | TCAACAACCTCTGGGCAAAGC    | 60 °C - 10"<br>72 °C – 20" |

Supplementary Table S2. Top 60 most differentially expressed genes at basal level between l- and h-PDLCs.

| Symbol   | Log2FC_High | Log2FC_Low |                                          |
|----------|-------------|------------|------------------------------------------|
| C1QL3    | 7.625       | -6.019     |                                          |
| CX3CR1   | 5.019       | -5.220     | Symbol: gene identification              |
| DLX4     | 9.064       | -7.405     | Log2FC_High: log2 fold change in h-PDLCs |
| EGFLAM   | 8.784       | -5.718     | Log2FC_Low: log2 fold change in l-PDLCs  |
| FABP7    | 5.019       | -5.746     | Negative Log2FC: gene downregulated      |
| FOXO6    | 6.893       | -5.496     | Positive Log2FC: gene upregulated        |
| GRM3     | 5.996       | -5.535     |                                          |
| KRT18    | 7.231       | -5.661     |                                          |
| KRT81    | 7.441       | -5.304     |                                          |
| LRRC18   | 7.154       | -5.384     |                                          |
| PCDH1    | 5.535       | -7.860     |                                          |
| PLD4     | 6.688       | -5.081     |                                          |
| PLEKHN1  | 7.566       | -5.788     |                                          |
| PLVAP    | 6.450       | -5.336     |                                          |
| PSMB9    | 5.996       | -7.824     |                                          |
| SP7      | 8.370       | -6.736     |                                          |
| THNSL2   | 8.386       | -9.274     |                                          |
| TNNC1    | 5.306       | -5.222     |                                          |
| TSPAN18  | 6.010       | -6.372     |                                          |
| ABLIM2   | -5.641      | 5.194      |                                          |
| ACTN3    | -7.207      | 5.628      |                                          |
| ADH1C    | -5.055      | 6.301      |                                          |
| ADORA1   | -8.120      | 6.640      |                                          |
| BCHE     | -5.931      | 8.511      |                                          |
| BEX1     | -6.627      | 5.087      |                                          |
| BMP5     | -6.847      | 5.351      |                                          |
| CASQ1    | -7.207      | 5.663      |                                          |
| CDH18    | -8.811      | 6.780      |                                          |
| CHGB     | -7.207      | 5.556      |                                          |
| DDX25    | -5.070      | 5.158      |                                          |
| DNAJB7   | -5.070      | 5.193      |                                          |
| EPHA6    | -6.847      | 5.058      |                                          |
| ERICH5   | -7.207      | 6.679      |                                          |
| FIBCD1   | -8.616      | 6.901      |                                          |
| GALNT13  | -12.680     | 11.179     |                                          |
| GRID2    | -6.847      | 5.191      |                                          |
| IFNE     | -6.627      | 5.085      |                                          |
| IGFALS   | -7.358      | 5.769      |                                          |
| IGSF3    | -7.558      | 5.722      |                                          |
| IL1RN    | -6.847      | 5.519      |                                          |
| IL4      | -6.847      | 6.034      |                                          |
| IRX6     | -7.940      | 6.395      |                                          |
| JPH1     | -7.125      | 5.697      |                                          |
| L1TD1    | -6.627      | 5.372      |                                          |
| LRRTM1   | -5.070      | 5.511      |                                          |
| MAB21L2  | -6.937      | 7.049      |                                          |
| NKD1     | -5.070      | 7.181      |                                          |
| OCM      | -7.207      | 5.886      |                                          |
| OR5K2    | -6.627      | 5.165      |                                          |
| PCDH10   | -5.899      | 5.883      |                                          |
| PSG1     | -7.734      | 5.329      |                                          |
| PSMA8    | -6.627      | 5.189      |                                          |
| RSPH1    | -5.641      | 5.084      |                                          |
| SCN7A    | -7.678      | 6.244      |                                          |
| SIX3     | -9.369      | 5.630      |                                          |
| SLITRK5  | -5.140      | 5.146      |                                          |
| SMOC1    | -6.733      | 6.101      |                                          |
| TMEM196  | -6.627      | 5.144      |                                          |
| TMEM74   | -6.847      | 5.340      |                                          |
| TP53TG3D | -7.358      | 5.367      |                                          |

Supplementary Table S3. Top 150 most differentially expressed genes at induced levels in l- and h-PDLCs

| Symbol          | Log2FC<br>Low | Log2FC<br>High | Symbol             | Log2FC<br>Low | Log2FC<br>High | Symbol        | Log2FC<br>Low | Log2FC<br>High |
|-----------------|---------------|----------------|--------------------|---------------|----------------|---------------|---------------|----------------|
| BST2            | 7.196         | 5.918          | AC069368.1         | 6.340         | -2.353         | EPHB6         | 0.174         | 11.538         |
| CHKB-CPT1B      | 6.436         | 5.774          | CD101              | 8.129         | -1.489         | GOLGA8A       | -2.813        | 12.699         |
| FGL1            | 4.698         | 2.577          | ASB2               | 4.445         | -2.998         | HNRNPAB       | 5.902         | 8.637          |
| ART3            | 8.085         | 4.343          | ATP6AP1            | 4.401         | -3.091         | FAM117B       | 6.236         | 8.179          |
| COMTD1          | 7.158         | 2.758          | DLEC1              | 4.908         | -4.146         | CEMP1         | 4.420         | 9.641          |
| CRABP1          | 4.860         | 4.305          | CTAGE15            | 4.561         | -4.268         | CXCR5         | 4.826         | 12.415         |
| FCMR            | 4.653         | 4.074          | AC004223.3         | 4.328         | -4.160         | EXPH5         | -2.612        | 5.034          |
| GPM6B           | 4.503         | 3.449          | HSD17B11           | 4.375         | -4.287         | FUT6          | -2.601        | 4.897          |
| CEMIP           | 4.321         | 3.487          | CHRFAM7A           | 5.545         | -3.811         | AL049844.3    | -2.823        | 5.179          |
| FKBP5           | 5.762         | 3.715          | AMDHD1             | 6.250         | -4.564         | HLA-DOA       | -2.826        | 4.986          |
| ANO3            | 4.541         | 2.968          | GMNC               | 8.830         | -4.738         | CATSPERG      | -2.219        | 5.532          |
| FCHO1           | 5.449         | 5.612          | ARHGAP20           | 8.498         | -4.993         | DRGX          | -2.687        | 5.468          |
| DGKB            | 4.289         | 6.676          | BORCS8-<br>MEF2B   | 7.399         | -4.885         | FOXE3         | -3.786        | 5.844          |
| FBXO43          | 3.639         | 6.930          | ANKRD26            | 9.161         | -7.281         | CRLF2         | -3.797        | 5.754          |
| ADGRF2          | 4.348         | 6.116          | GNL1               | 8.281         | -7.396         | DND1          | -3.791        | 5.254          |
| DPEP1           | 3.946         | 5.837          | AC012184.2         | 7.842         | -7.396         | C1QTNF3-AMACR | -1.725        | 6.259          |
| CXCL8           | 3.315         | 6.063          | CORO7-<br>PAM16    | 6.791         | -6.630         | GPAT2         | -2.709        | 6.267          |
| INMT-MINDY4     | 2.813         | 6.040          | AC090527.2         | 6.118         | -5.955         | AC104662.2    | -4.501        | 5.009          |
| DKK1            | 2.550         | 6.567          | AL022318.4         | 5.650         | -6.168         | C19ORF67      | -5.132        | 4.898          |
| COMP            | 3.819         | 5.213          | ITIH5              | 5.371         | -7.351         | CKAP2L        | -5.383        | 6.646          |
| DAPP1           | 3.542         | 5.073          | FAM183A            | -0.368        | 5.432          | GCH1          | -6.244        | 6.206          |
| CFAP65          | 2.980         | 5.238          | GAL3ST3            | -0.368        | 5.391          | KIF24         | -8.416        | 8.937          |
| BTLA            | 4.621         | 0.199          | AC068946.1         | -0.368        | 5.474          | FAM213B       | -9.038        | 6.174          |
| AURKA           | 4.582         | 0.199          | GNLY               | -0.368        | 5.256          |               |               |                |
| ADRA1A          | 4.691         | 0.199          | BOP1               | -0.368        | 5.226          |               |               |                |
| IGHV3-74        | 4.873         | 0.169          | CYTH4              | -0.368        | 5.068          |               |               |                |
| HLA-A           | 4.822         | -0.156         | FAM166B            | -0.368        | 5.029          |               |               |                |
| C3              | 4.570         | -0.092         | CLDN34             | -0.368        | 4.952          |               |               |                |
| CHI3L1          | 4.406         | 0.199          | CTXN3              | -0.860        | 5.095          |               |               |                |
| FPR2            | 4.397         | 0.199          | FIBCD1             | -0.982        | 5.131          |               |               |                |
| FPR1            | 4.445         | 0.200          | FOXD4L1            | -0.697        | 5.036          |               |               |                |
| GNGT1           | 4.378         | 0.199          | FAM189A2           | -0.677        | 5.387          |               |               |                |
| ATP13A4         | 4.353         | 0.250          | KIF18B             | -0.771        | 5.406          |               |               |                |
| IFITM5          | 4.502         | 0.199          | HYDIN              | -1.106        | 5.829          |               |               |                |
| ADAMDEC1        | 4.455         | 0.199          | CENPA              | -1.052        | 5.669          |               |               |                |
| ALOX15B         | 5.365         | 0.199          | BLOC1S5-<br>TXNDC5 | -0.711        | 5.980          |               |               |                |
| AL121758.1      | 5.245         | 0.199          | AF241726.2         | -1.364        | 5.210          |               |               |                |
| FMO3            | 5.119         | -0.275         | CHRM3              | -0.427        | 5.887          |               |               |                |
| HLA-B           | 5.194         | -1.021         | JSRP1              | -0.368        | 5.811          |               |               |                |
| ARHGDIG         | 4.974         | -0.990         | AGAP2              | -0.247        | 5.683          |               |               |                |
| GLRA3           | 5.131         | -0.804         | ALDOB              | -0.417        | 5.583          |               |               |                |
| CELA3B          | 5.134         | -1.310         | CHGB               | -0.042        | 6.048          |               |               |                |
| KCNN3           | 4.718         | -1.161         | AC008758.4         | -0.567        | 6.896          |               |               |                |
| GPR17           | 4.688         | -0.785         | ELMO3              | -0.368        | 6.649          |               |               |                |
| CARNS1          | 4.400         | -0.656         | CRYM               | 1.656         | 5.119          |               |               |                |
| COMMD3-<br>BMI1 | 5.942         | 0.199          | GPR82              | 1.597         | 5.131          |               |               |                |
| BIN2            | 5.888         | 0.199          | ADGRV1             | 1.565         | 5.501          |               |               |                |
| ADH4            | 6.249         | 0.199          | IGKV2-30           | 2.087         | 5.809          |               |               |                |
| DMKN            | 6.238         | -0.170         | AC104109.3         | 2.057         | 5.267          |               |               |                |
| CASC1           | 6.114         | -0.425         | C1ORF87            | 2.374         | 4.869          |               |               |                |
| KCNT1           | 5.617         | -0.751         | APOBEC3B           | 0.697         | 5.478          |               |               |                |
| CDH5            | 4.438         | 1.773          | DUXA               | 0.551         | 5.471          |               |               |                |
| HKDC1           | 4.367         | 1.499          | ASF1B              | 0.508         | 5.667          |               |               |                |
| HPD             | 4.822         | 0.974          | BLID               | 0.566         | 6.014          |               |               |                |
| FGR             | 4.419         | 1.145          | CDC45              | 1.091         | 5.678          |               |               |                |
| ABCA2           | 5.364         | 0.584          | BMP7               | 0.059         | 5.225          |               |               |                |
| ANKDD1A         | 5.164         | 0.753          | GSY2               | 0.311         | 4.899          |               |               |                |
| CCDC13          | 5.945         | 0.965          | HNRNPA1L2          | -0.700        | 8.914          |               |               |                |
| GRIA2           | 6.679         | 0.707          | KIAA1107           | -0.956        | 9.016          |               |               |                |
| C17ORF100       | 6.654         | 0.346          | CNNM1              | -0.368        | 8.265          |               |               |                |
| ANO2            | 7.906         | 0.290          | CYP19A1            | 2.071         | 7.976          |               |               |                |
| ABL2            | 9.535         | 1.259          | CDC25C             | 1.035         | 6.983          |               |               |                |
| ERVMER34-1      | 6.593         | -1.408         |                    |               |                |               |               |                |
| COL26A1         | 6.227         | -1.335         |                    |               |                |               |               |                |

Symbol: gene identification  
Log2FC\_High: log2 fold change in h-PDLCs  
Log2FC\_Low: log2 fold change in l-PDLCs  
Negative Log2FC: gene downregulated  
Positive Log2FC: gene upregulated

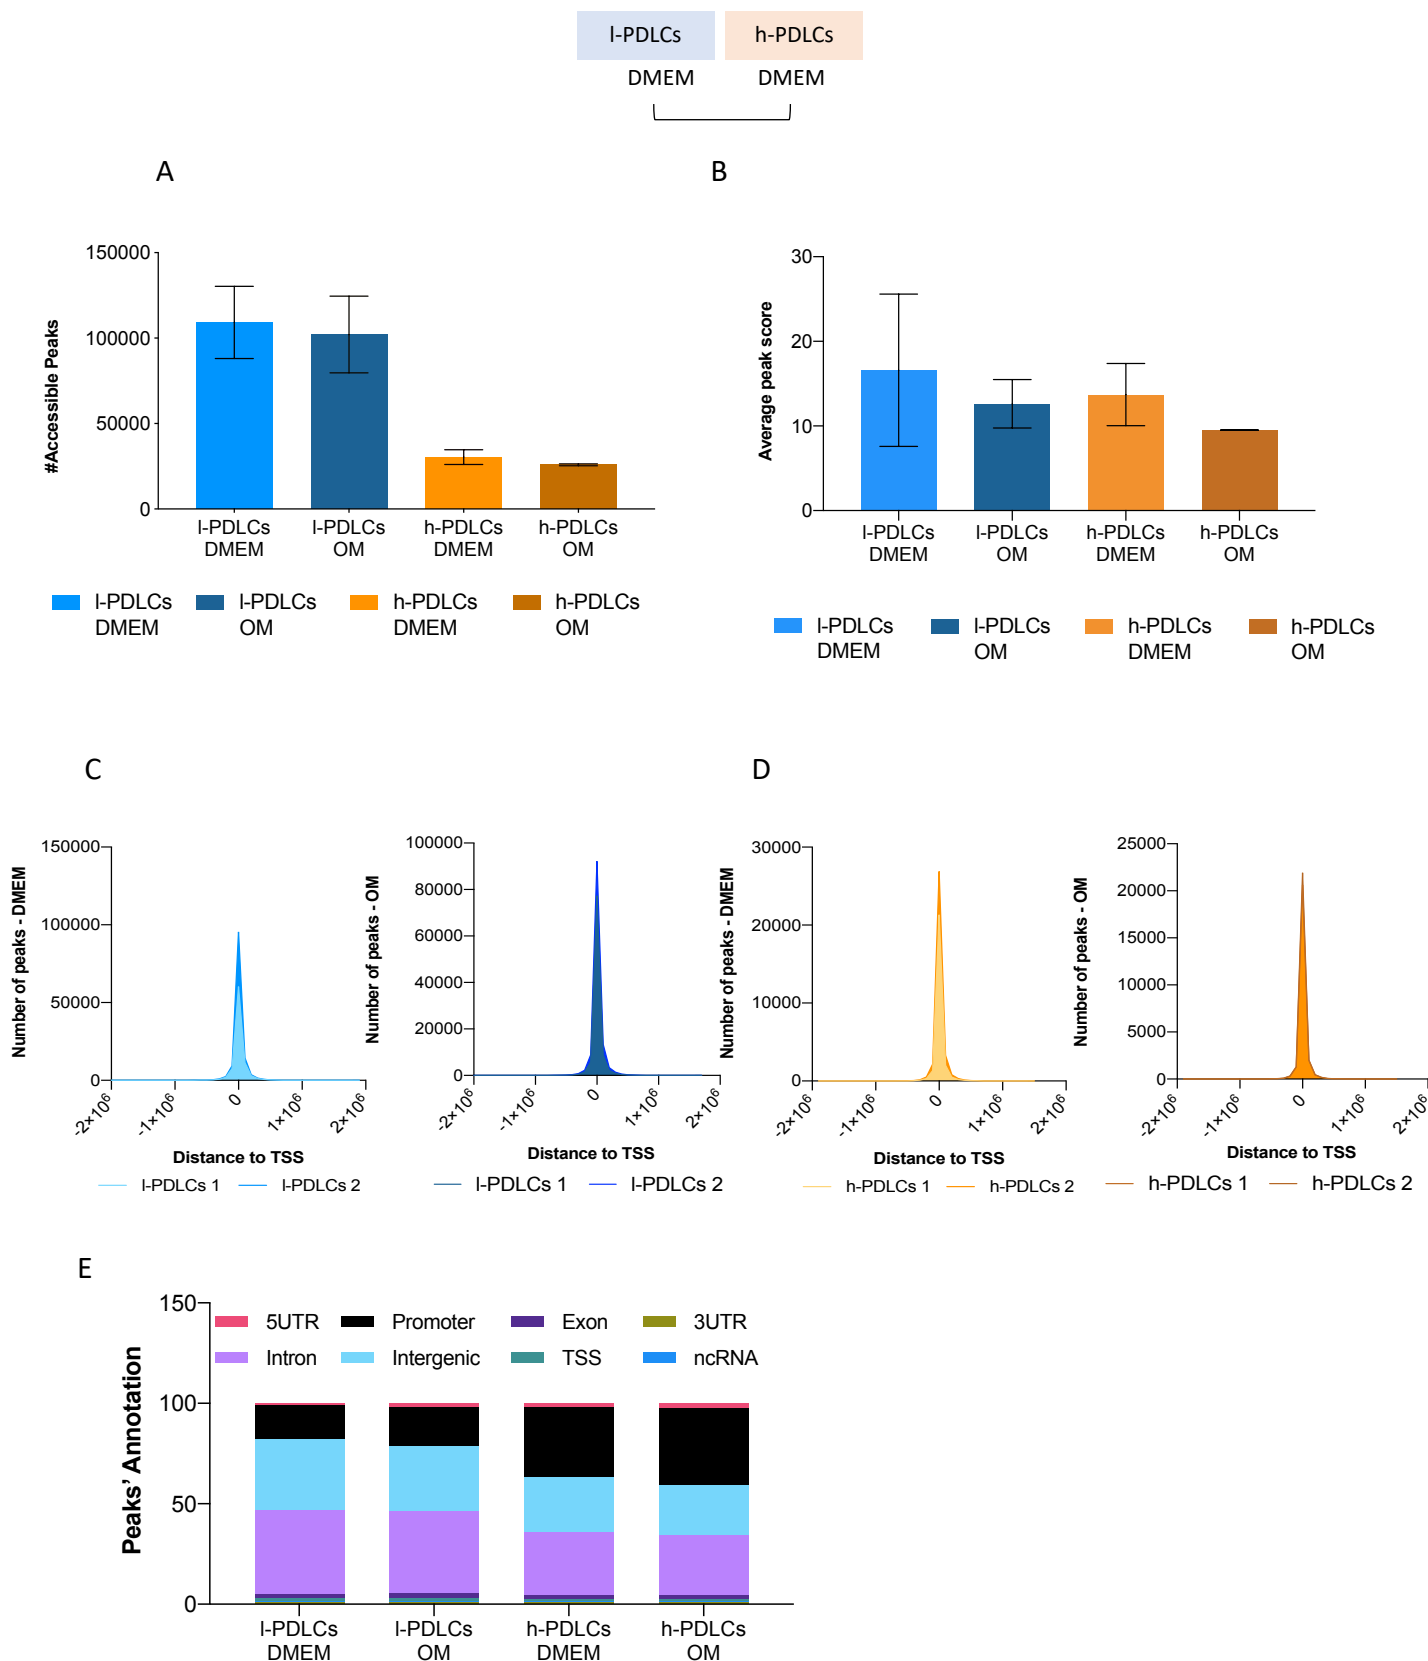

**Supplementary figure S1. Chromatin accessibility in PDLCs.** (A) Number of accessible chromatin peaks in I-PDLCs and h-PDLCs. (B) Average peak score at basal levels for I-PDLCs and h-PDLCs. (C, D) Distribution of peaks in relation to the nearest transcription start site (TSS) for each ATAC-seq replicate and experimental condition in I-PDLCs (C) and h-PDLCs (D). (E) Peaks' annotations shown as percentage of all peaks and compared between the experimental conditions. I-PDLCs, periodontal ligament cells showing low osteogenic potential *in vitro*; h-PDLCs, periodontal ligament cells showing high osteogenic potential *in vitro*.

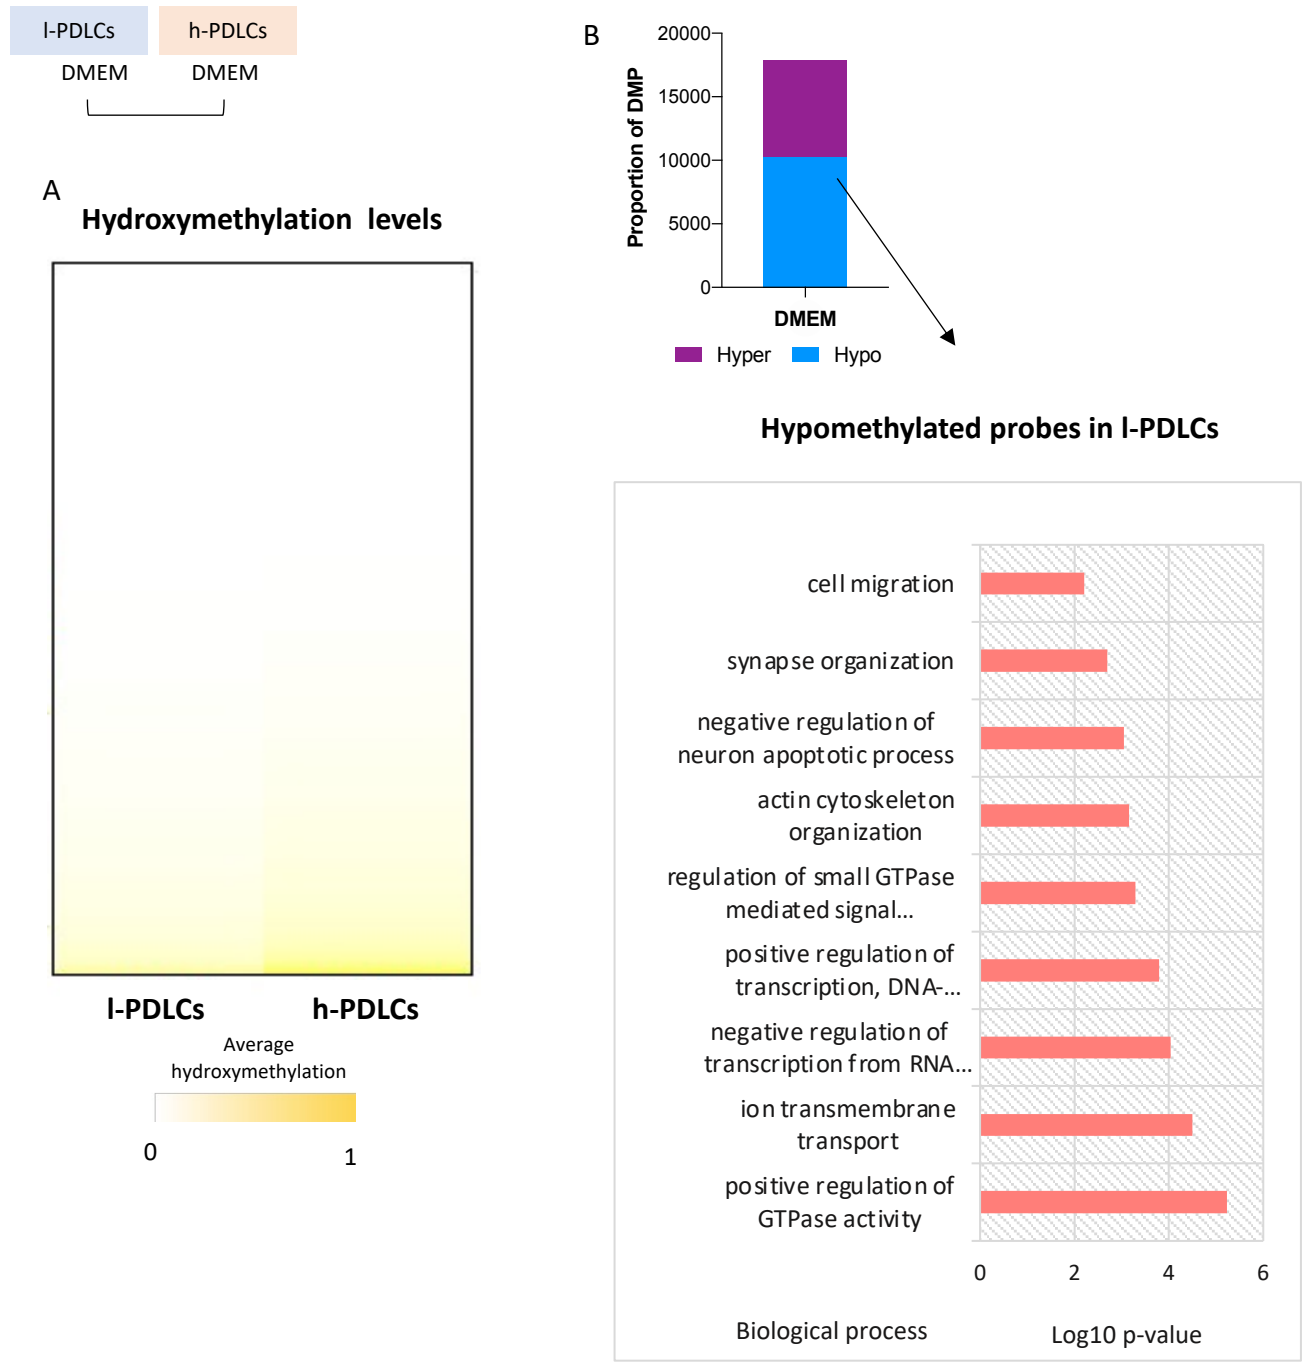

**Supplementary figure S2. DNA hydroxymethylation of PDLCs at basal levels.** (A) Heatmap showing DNA hydroxymethylation levels of all DNA methylation sites. (B) The proportion of 14,194 differentially methylated probes at day 10 of osteogenic stimulations *in vitro* in I-PDLCs (upper graph) and biological processes related to this subset. I-PDLCs, periodontal ligament cells showing low osteogenic potential *in vitro*; h-PDLCs, periodontal ligament cells showing high osteogenic potential *in vitro*.

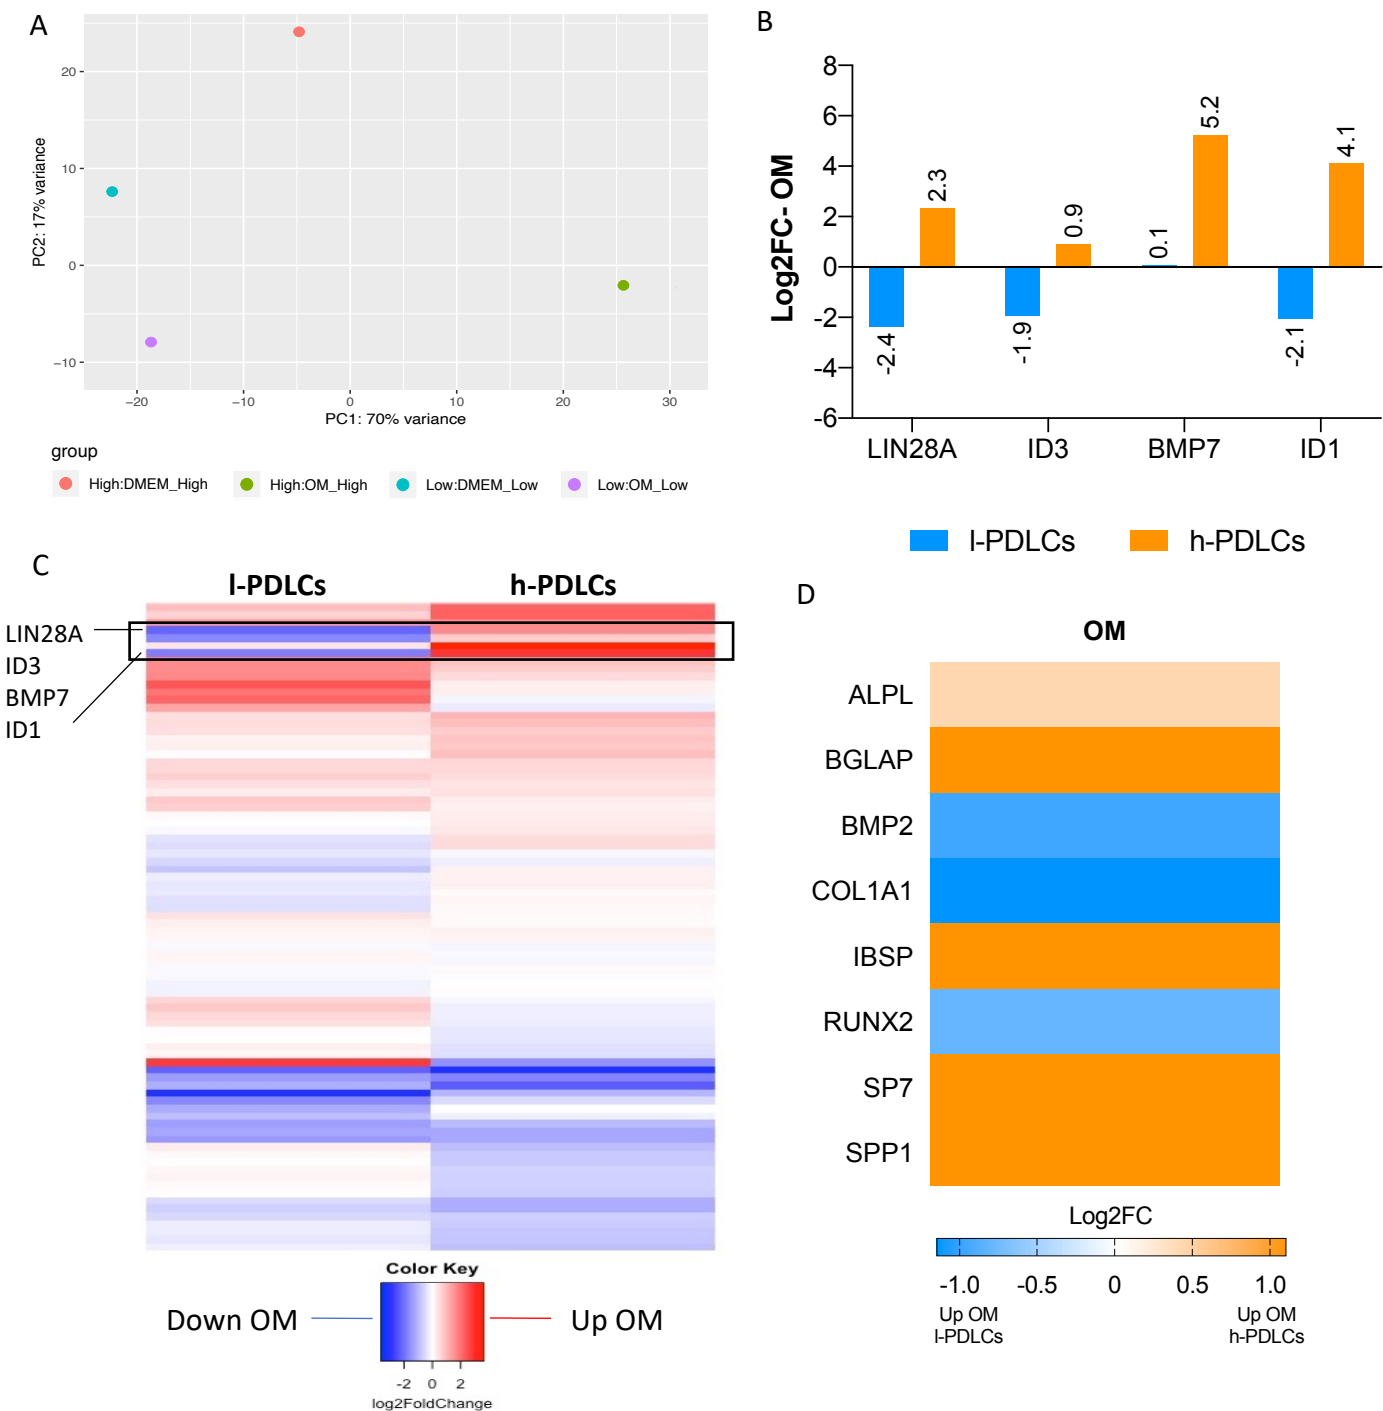

**Supplementary figure S3. Transcriptional analysis of osteogenic markers.** (A) PCA plot of RNA-seq data showing the four experimental conditions: h-PDLCs in DMEM, h-PDLCs in OM, I-PDLCs in DMEM and I-PDLCs in OM. For each condition, three independent replicates were first performed and then pooled for sequencing. The variability represented by the first component clearly separates the h-PDLCs after OM stimulation from the other samples. (B) OM-induced gene expression changes in RNA-seq data in I-PDLCs and h-PDLCs. The panel represents genes responsible for controlling osteoblast lineage progression as described in “Genetic and transcriptional control of bone formation” by Javed et al. (2010). (C) Gene expression changes for four genes most differentially up-regulated by OM in h-PDLCs (as highlighted in (B)). (D) Comparison of gene expression levels of classical osteogenic markers between I- and h-PDLCs at day 10 of osteogenic stimulation. I-PDLCs, periodontal ligament cells showing low osteogenic potential *in vitro*; h-PDLCs, periodontal ligament cells showing high osteogenic potential *in vitro*.

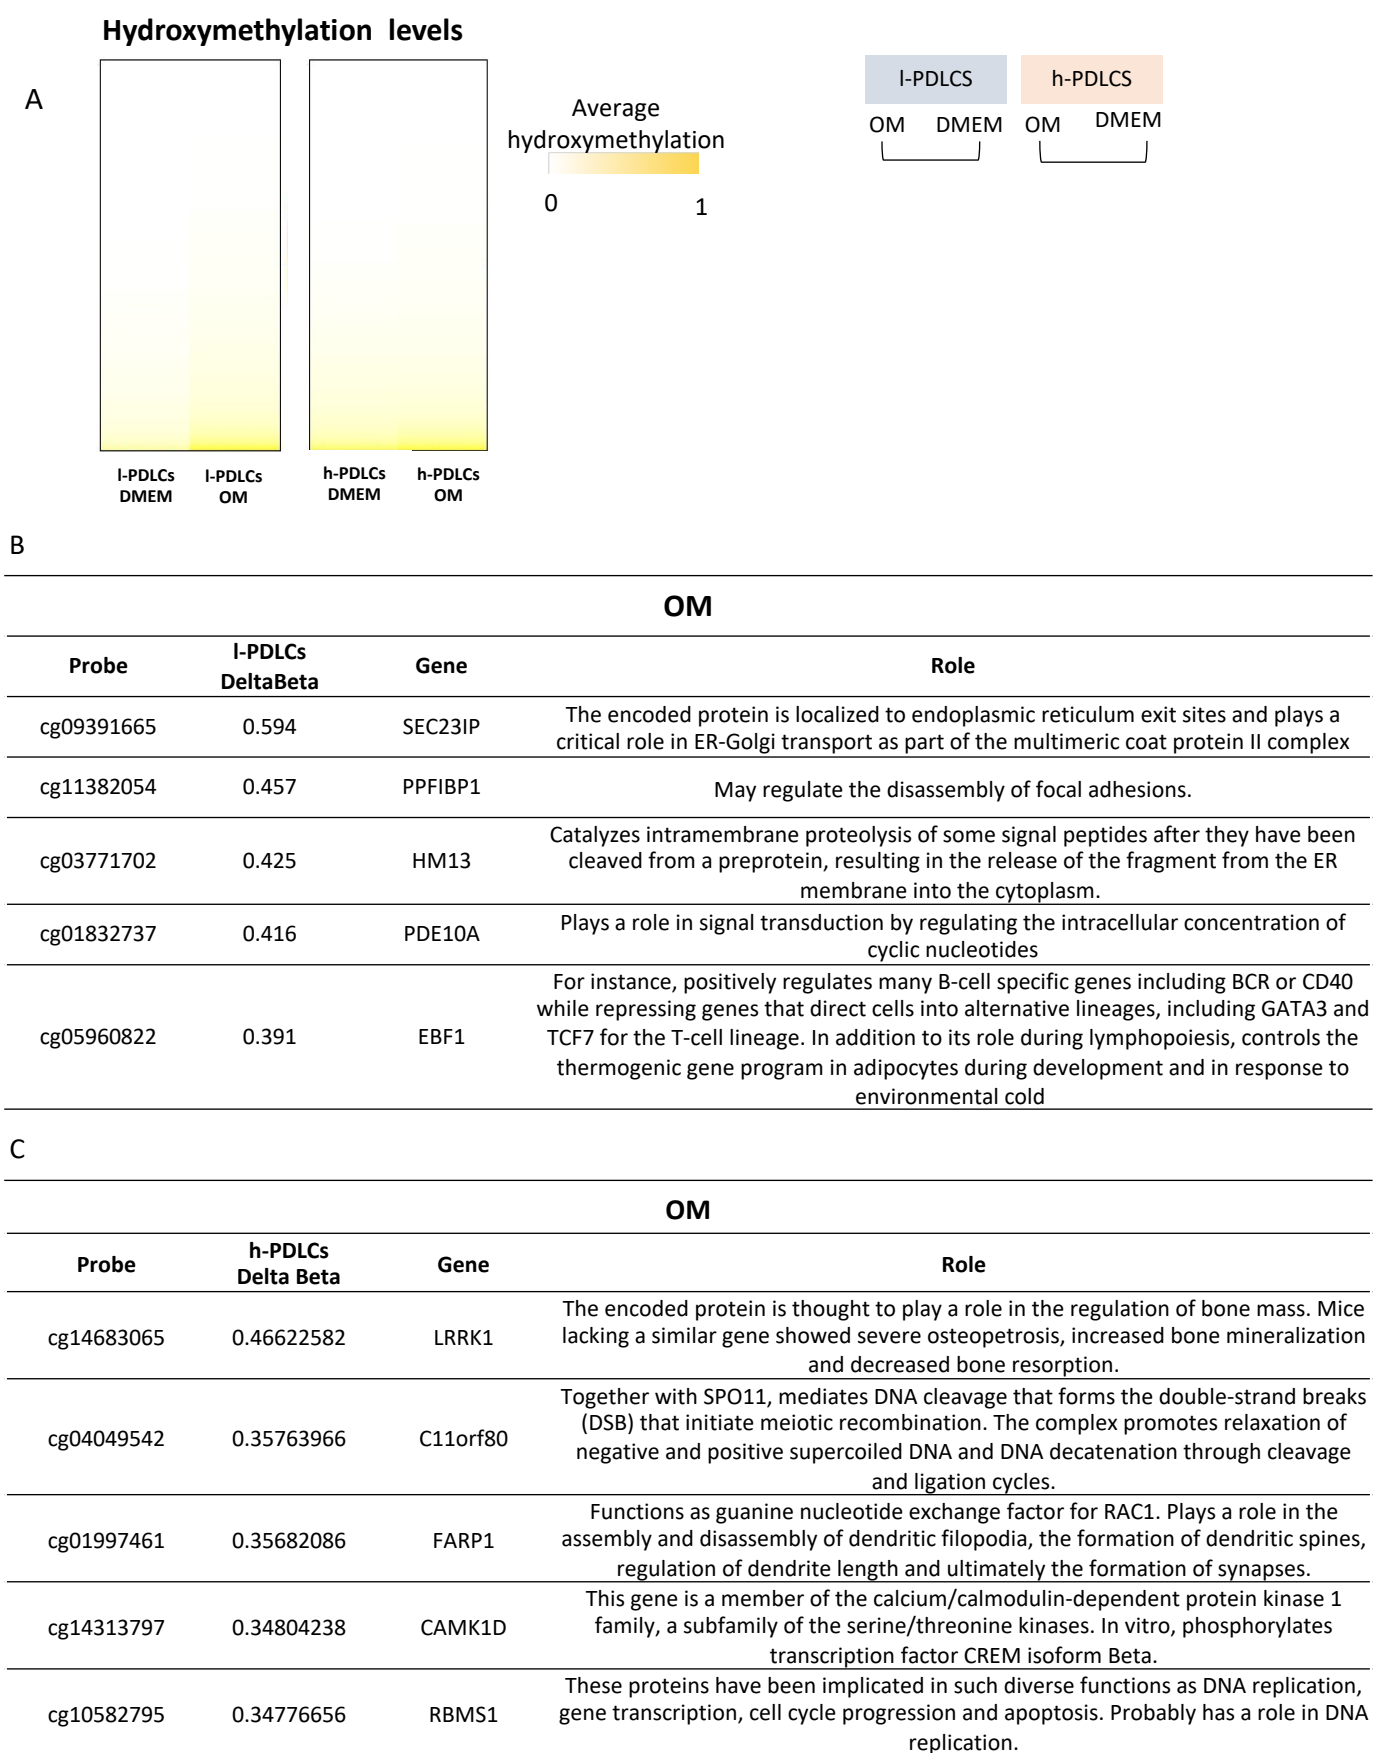

**Supplementary figure S4. DNA hydroxymethylation in PDLCs following osteogenic induction.** (A) Heatmap showing DNA hydroxymethylation levels of 850,000 DNA methylation sites at basal state and after 10 days of osteogenic induction. (B) Top 5 most DNA hydroxymethylated probes in I-PDLCs after osteogenic induction. (C) Top 5 most hydroxymethylated probes in h-PDLCs at induced levels. I-PDLCs, periodontal ligament cells showing low osteogenic potential *in vitro*; h-PDLCs, periodontal ligament cells showing high osteogenic potential *in vitro*. DMEM, standard culture medium; OM, osteogenic medium.
